# Supplementary material
Source: PubMed Central journal article supplement (PMC7332086)

# Supplemental Figure S1

## Ocular Proptosis Induced by Adrenergic Agonist on C57BL/6J Wild-type mice

**A**

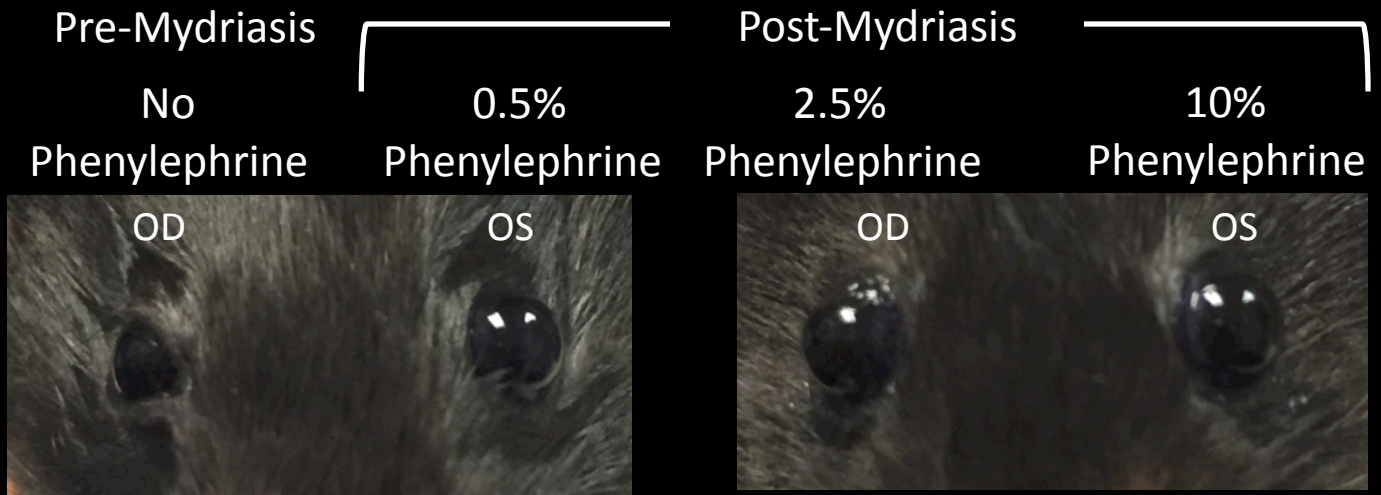

**B**

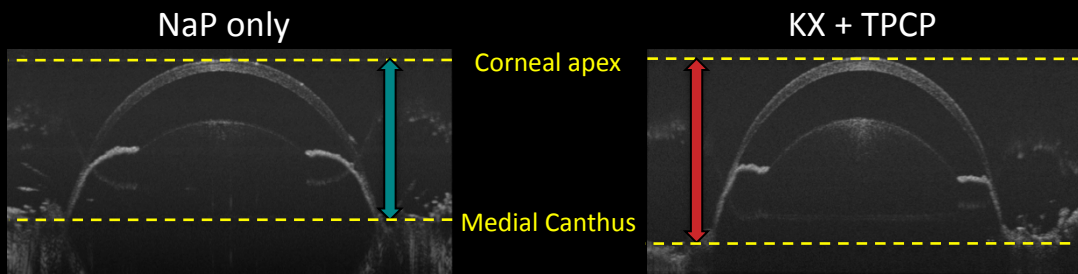

**C**

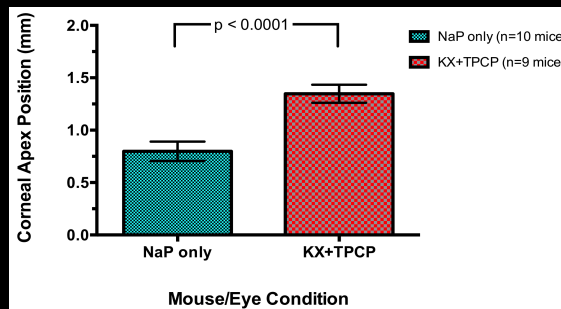

Supplement: NIHMS1596371-supplement-Figure_S1.pdf [file NIHMS1596371-supplement-Figure_S1.pdf]
