# Supplementary material
Source: PubMed Central journal article supplement (PMC7332086)

Supplemental Figure S7

No Abnormalities  
( $\frac{1}{2}$  hr or less exposure)

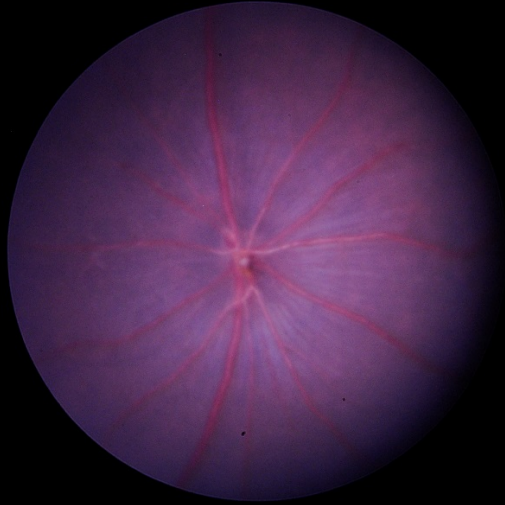

Small Impact  
( $\sim \frac{3}{4}$  hr exposure)

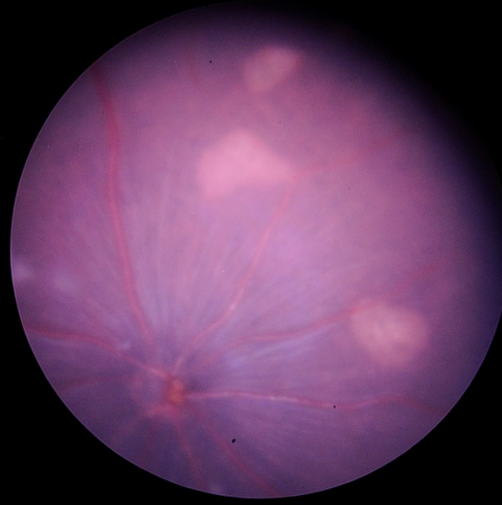

Large Impact  
( $\geq 1$  hr exposure)

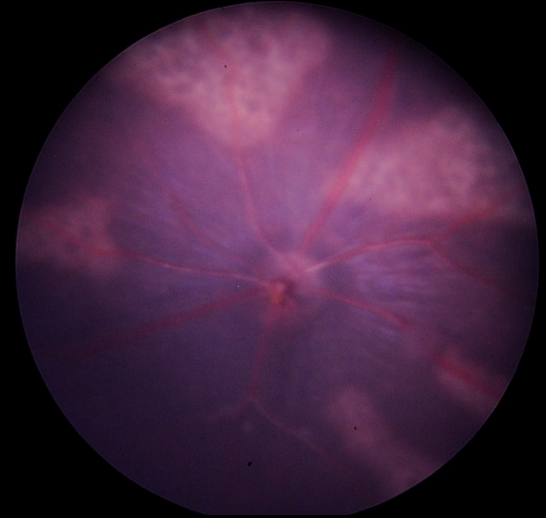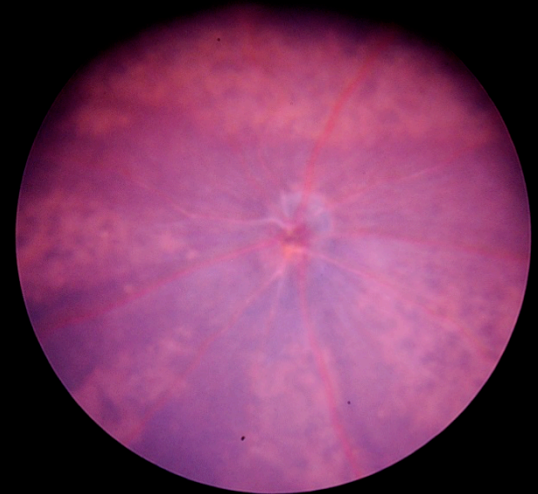

Supplement: NIHMS1596371-supplement-Figure_S7.pdf [file NIHMS1596371-supplement-Figure_S7.pdf]
