# Supplementary material
Source: PubMed Central journal article supplement (PMC7332086)

# Supplemental Figure S8

Open Chamber

Closed Chamber

**A**

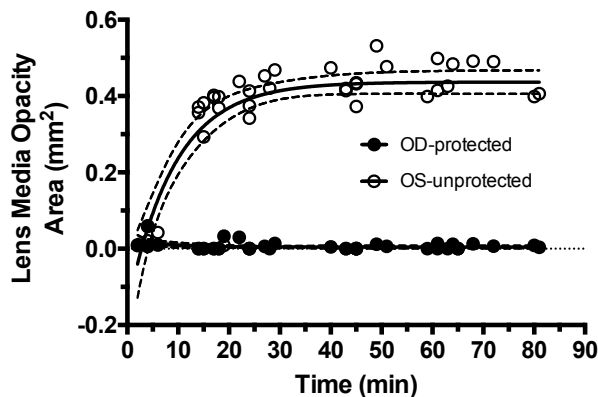

**B**

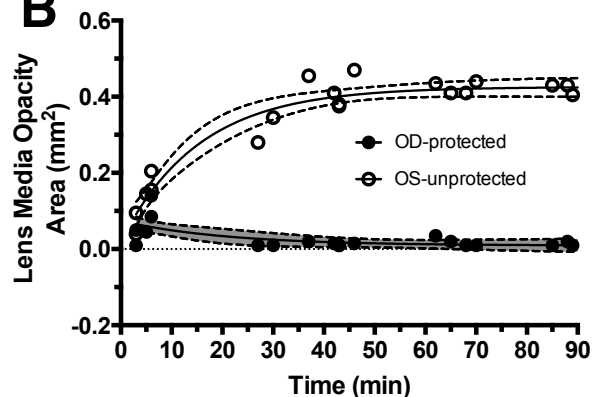

**C**

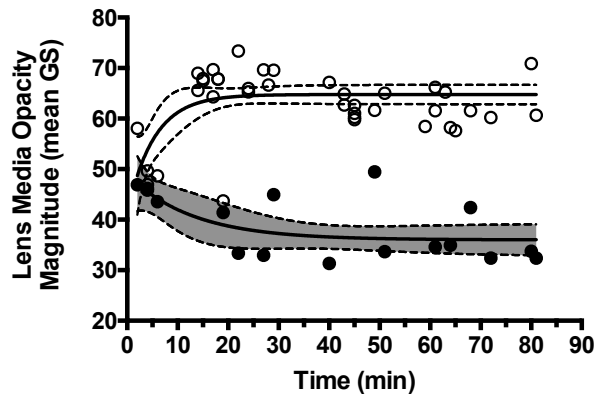

**D**

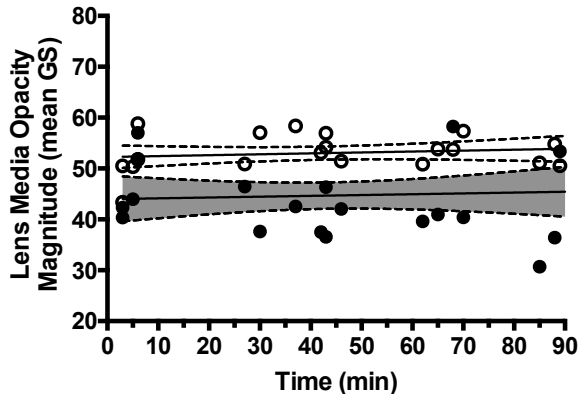

Supplement: NIHMS1596371-supplement-FIgure_S8.pdf [file NIHMS1596371-supplement-FIgure_S8.pdf]

**Figure S3: Experimental Procedure 2 Flow Chart**

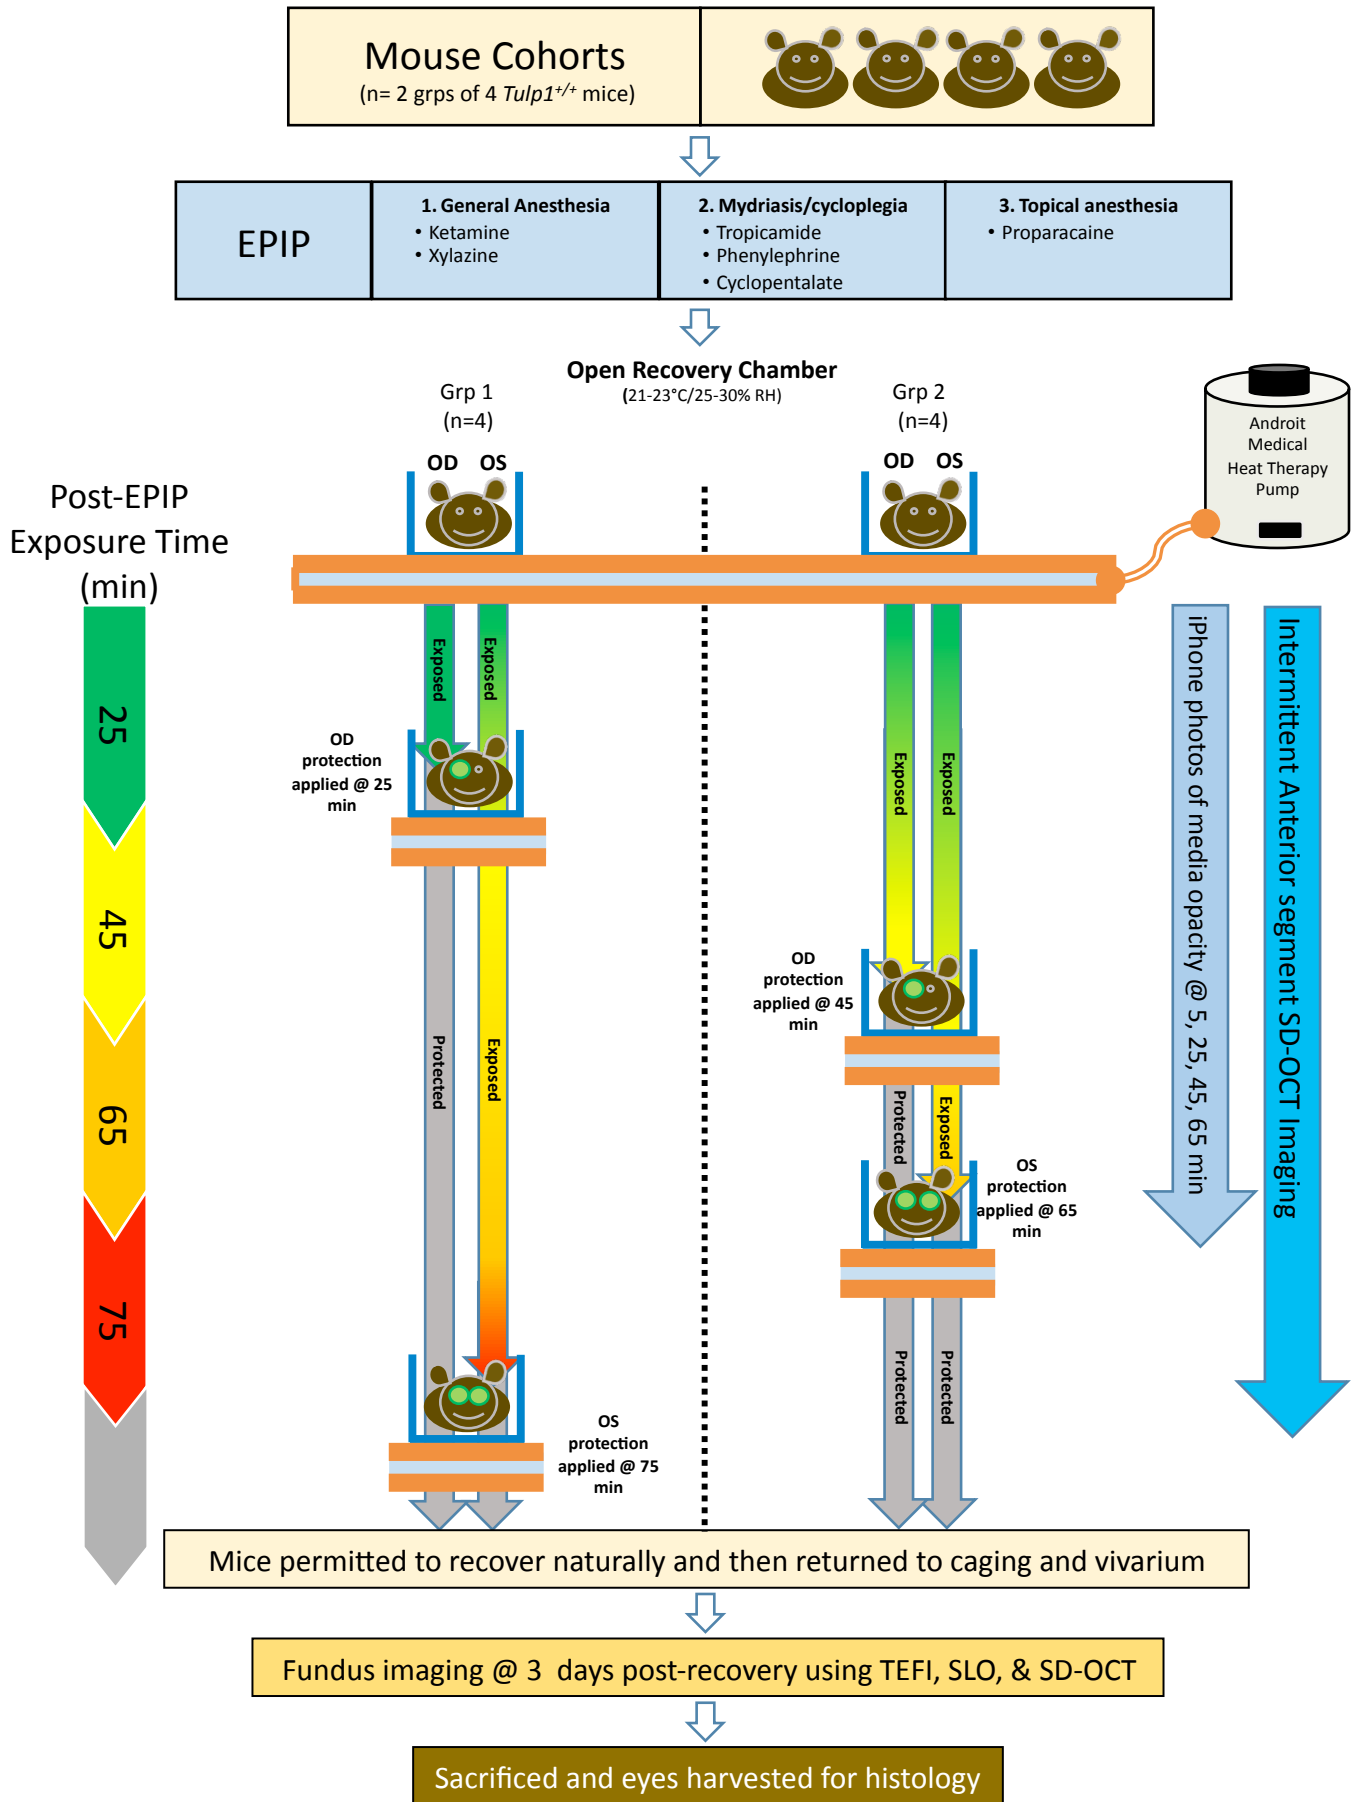

Supplement: NIHMS1596371-supplement-Figure_S3.pdf [file NIHMS1596371-supplement-Figure_S3.pdf]

# Supplemental Figure S4

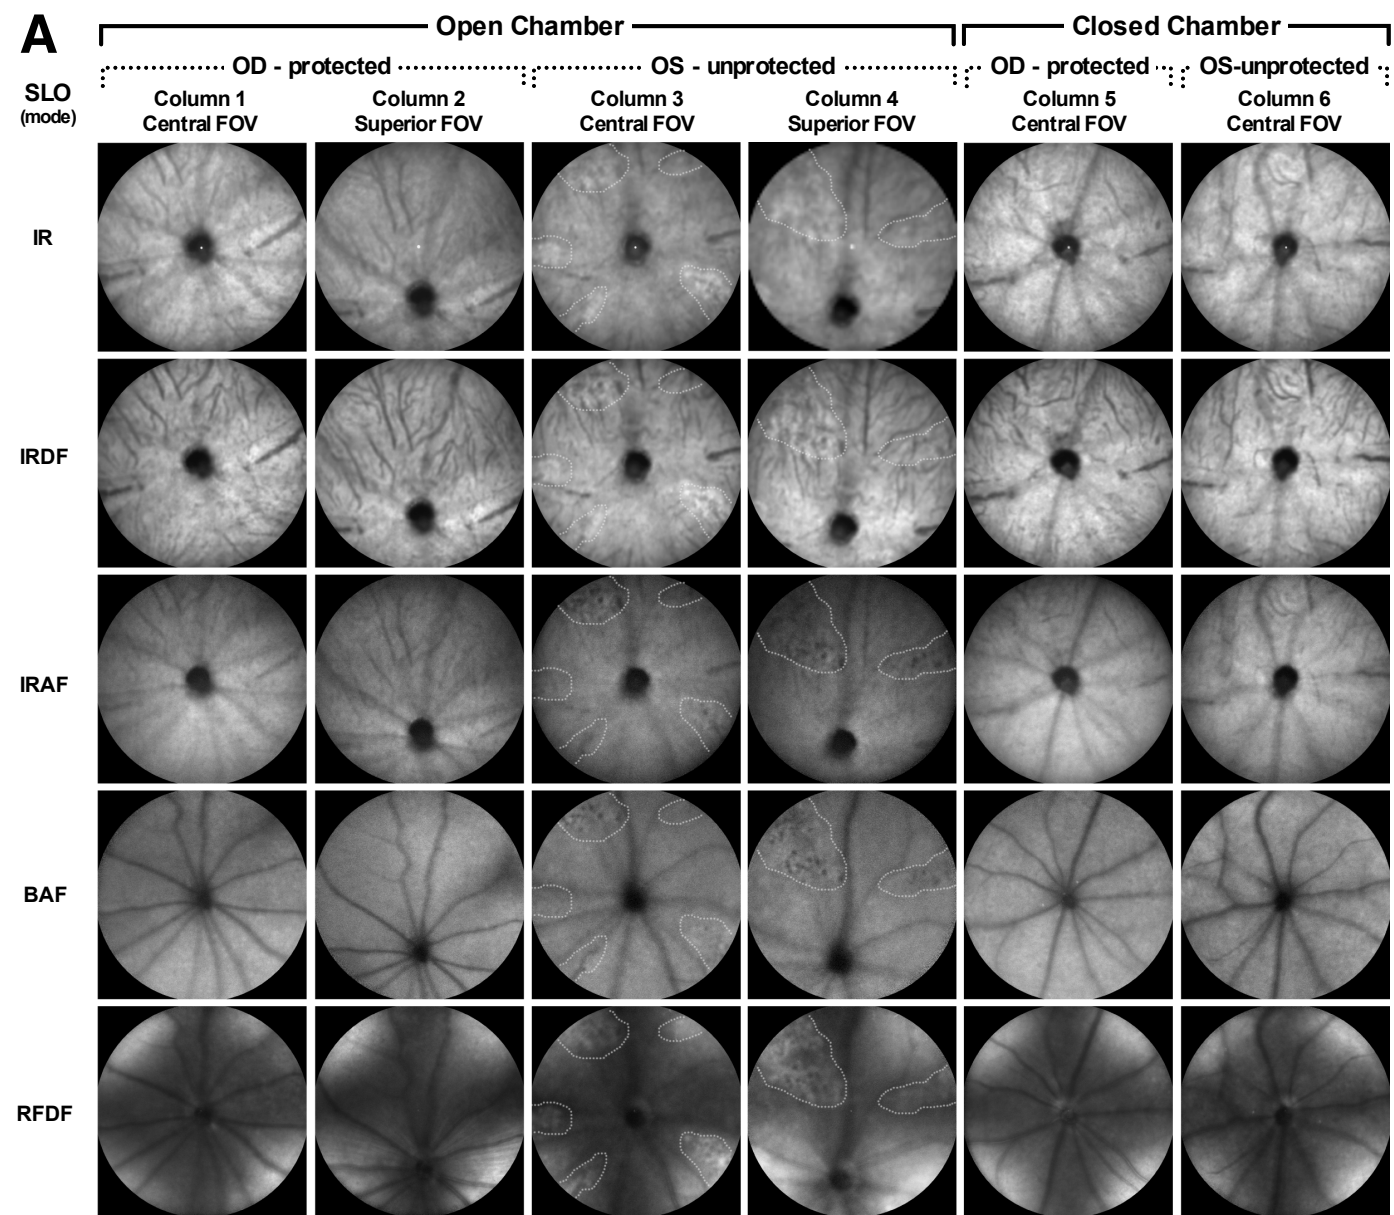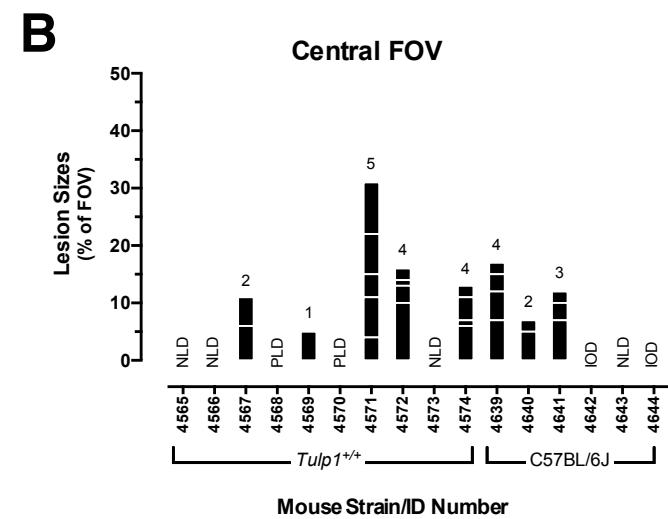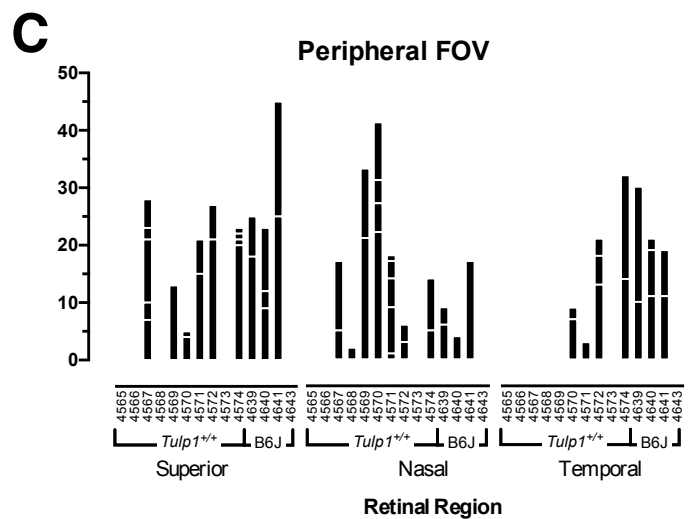

Supplement: NIHMS1596371-supplement-Figure_S4.pdf [file NIHMS1596371-supplement-Figure_S4.pdf]

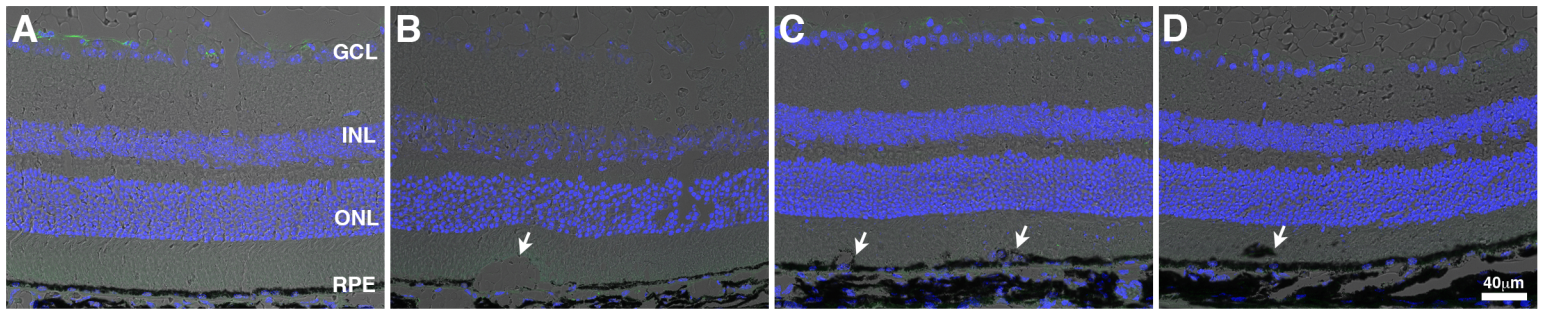

Supplement: NIHMS1596371-supplement-Figure_S5.pdf [file NIHMS1596371-supplement-Figure_S5.pdf]

# Supplemental Figure S6

## Open chamber

## Closed chamber

**A**

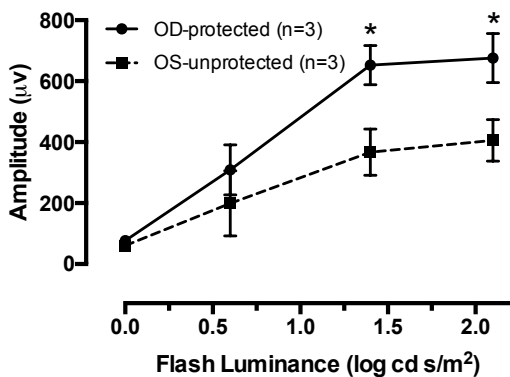

**B**

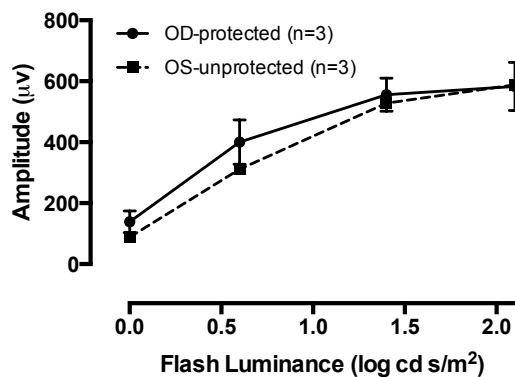

**C**

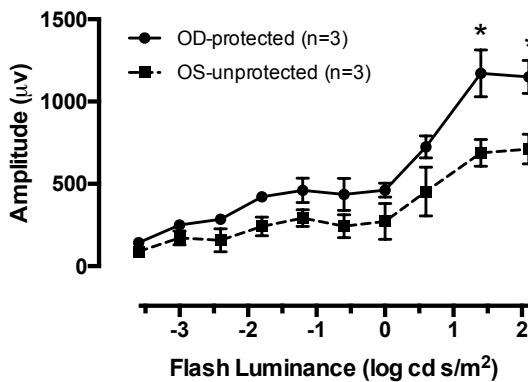

**D**

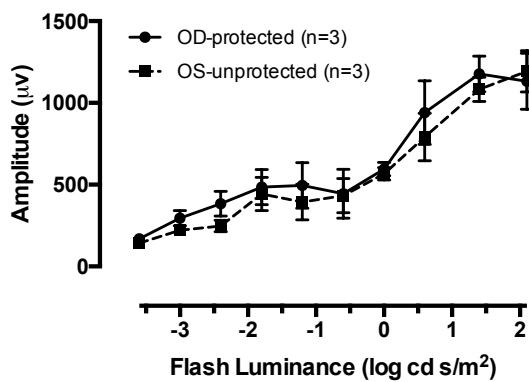

**E**

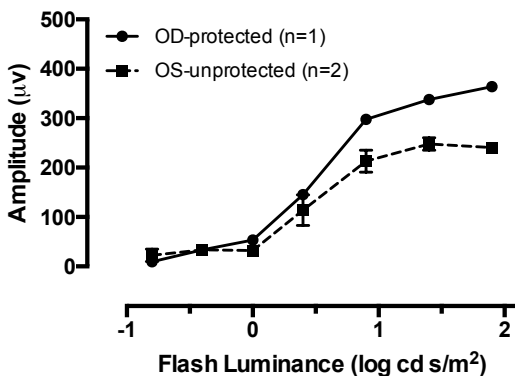

**F**

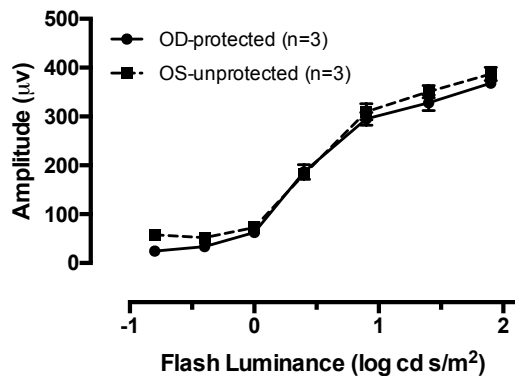

Supplement: NIHMS1596371-supplement-Figure_S6.pdf [file NIHMS1596371-supplement-Figure_S6.pdf]

# Supplemental Figure S9

Time:  
(min)

Example A

4

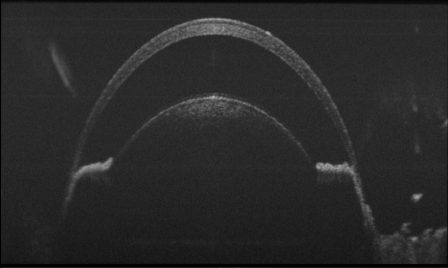

22

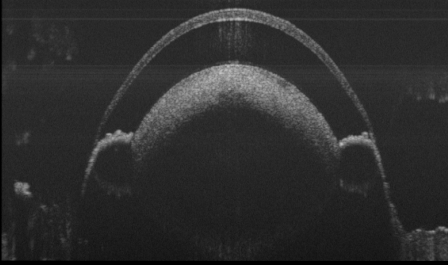

40

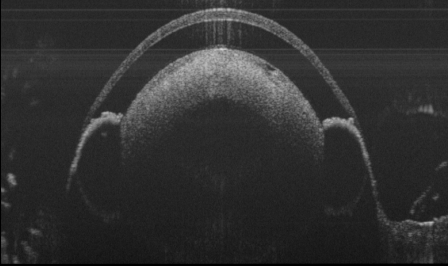

61

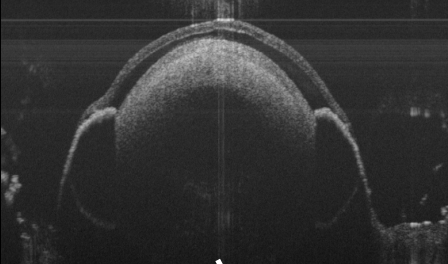

72

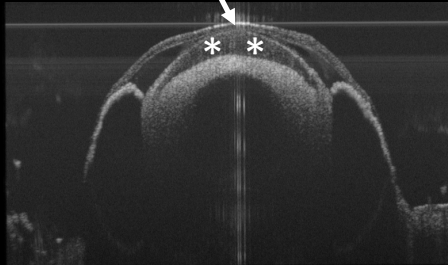

Time:  
(min)

Example B

2

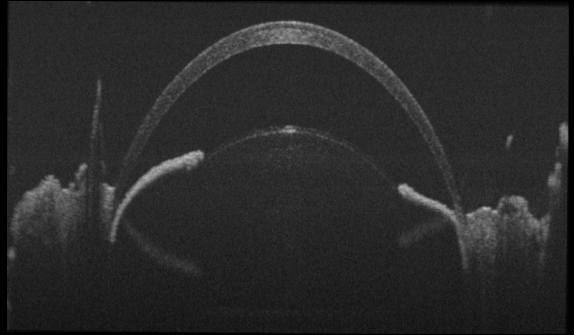

29

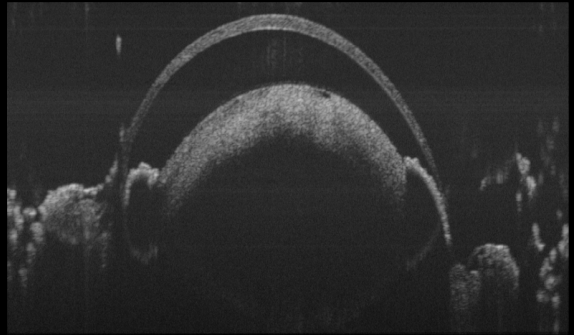

64

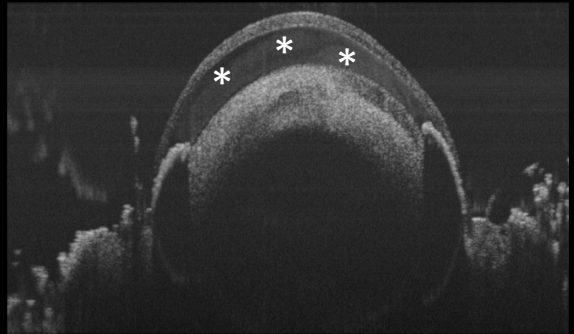

81

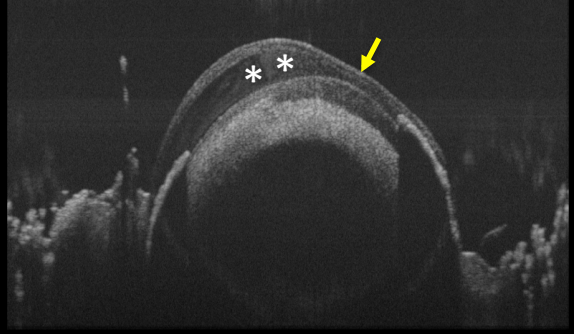

Supplement: NIHMS1596371-supplement-Figure_S9.pdf [file NIHMS1596371-supplement-Figure_S9.pdf]
